# Supplementary material for: An Evaluation of Antiretroviral Therapy Adherence in a Community-Based Multi-Month Dispensing Model in Dodoma City Council
Source: Research Square preprint supplement (doi:10.21203/rs.3.rs-4829377/v1), 2024-08-21
Supplement: Supplementary file 1 [file 16d91a74f71d32627c0b67fc.xlsx]

## Sheet: Sheet1
Level of HF	Multimonth Dispensing	Fastrack Refill	Clinical Extended hours	Community ART Group	Services Applied	Number of ART enrollers	Fastrack Refils	Community based Services	Retain in Care	LTF	Number of enroled in ART(by Age)	WHO-stage	On 3MMD	On 6MMD	Viral Suppression (VL<50 )	They received ART from Multi-months refills from a health facility	If service ART received is youth-friendly	Services tailored to the needs of youth	Adherence level	Reasons for felt stigmatization
Health facility	Yes	Yes	Yes	0	Drug refill	46	36	10	Yes	3	42	Stage-i	Yes	No	yes	No	yes	No	1
Dispensary	Yes	Yes	Yes	1	Clinical consultation	24	19	5	Yes	1	41	Stage-ii	Yes	No	No	Yes	No	No	2
Regional Referral Hospital	Yes	Yes	Yes	1	Individual counselling	120	100	20	Yes	7	53	Stage-ii	Yes	No	Yes	Yes	Yes	No	1
District Hospital	No	Yes	Yes	0	Getting a Dispensing	90	66	24	No	1	53	Stage-ii	No	Yes	No	No	No	No	2
Health facility	No	Yes	Yes	1	Laboratory blood draw	45	40	5	No	7	53	Stage-i	No	Yes	yes	No	yes	No	1
Dispensary	Yes	Yes	Yes	1	Weighing, BP measurement	118	76	42	No	4	53	Stage-ii	No	Yes	yes	Yes	No	No	1
Regional Referral Hospital	Yes	Yes	No	1	Getting a TCA date	143	92	51	No	11	53	Stage-ii	No	Yes	yes	Yes	Yes	No	1
District Hospital	Yes	Yes	No	0	Others (TB, STI screening, provision of FP services	90	54	36	Yes	2	48	Stage-ii	Yes	No	yes	No	No	No	1
Dispensary	Yes	Yes	No	0	Drug refill	1117	1067	50	Yes	19	48	Stage-i	Yes	No	yes	No	yes	No	1
Regional Referral Hospital	Yes	Yes	No	1	Clinical consultation	942	892	50	Yes	1	60	Stage-i	No	Yes	yes	Yes	No	No	1
District Hospital	Yes	Yes	No	1	Individual counselling	22	14	8	Yes	1	60	Stage-i	Yes	No	yes	Yes	Yes	No	1
Regional Referral Hospital	No	Yes	No	0	Getting a Dispensing	915	812	103	No	1	38	Stage-i	No	Yes	yes	No	No	No	1
District Hospital	No	Yes	No	1	Getting a TCA date	412	361	51	No	1	38	stage-ii	No	Yes	yes	Yes	yes	No	1
Health facility	Yes	Yes	No	0	Others (TB, STI screening, provision of FP services	54	31	23	No	1	38	stage-i	No	Yes	yes	Yes	No	No	1
Dispensary	Yes	Yes	Yes	1	Drug refill	713	513	200	No	23	50	Stage-i	Yes	No	yes	No	Yes	No	2
Dispensary	Yes	Yes	Yes	0	Drug refill	212	172	40	Yes	0	50	Stage-ii	No	Yes	yes	No	No	No	2
Regional Referral Hospital	Yes	Yes	Yes	1	Clinical consultation	318	281	37	Yes	0	27	Stage-ii	No	Yes	yes	Yes	yes	No	1
District Hospital	Yes	Yes	Yes	0	Weighing, BP measurement	732	542	190	Yes	2	27	Stage-ii	No	Yes	yes	Yes	No	No	1
Dispensary	Yes	Yes	Yes	1	Getting a TCA date	712	700	12	Yes	6	27	Stage-i	No	Yes	yes	No	Yes	No	1
Health facility	Yes	Yes	Yes	0	Others (TB, STI screening, provision of FP services	917	876	41	No	0	41	Stage-ii	Yes	No	yes	No	No	No	1
Dispensary	Yes	Yes	No	1	Drug refill	76	61	15	No	0	41	Stage-ii	Yes	No	yes	Yes	yes	No	1
Regional Referral Hospital	Yes	Yes	No	0	Clinical consultation	890	719	171	No	0	41	Stage-ii	Yes	No	yes	Yes	No	No	1
Health facility	Yes	Yes	No	1	Individual counselling	671	512	159	No	2	41	Stage-i	Yes	No	yes	No	Yes	No	1
Dispensary	Yes	Yes	No	1	Clinical consultation	459	312	147	Yes	0	43	Stage-i	Yes	No	yes	Yes	No	No	1
Regional Referral Hospital	Yes	No	No	1	Weighing, BP measurement	543	442	101	No	6	41	Stage-i	Yes	No	yes	Yes	yes	No	1
Regional Referral Hospital	Yes	No	Yes	0	Drug refill	725.83	600.21	125.62	No		41	Stage-i	Yes	No	yes	No	No	No	1
Regional Referral Hospital	Yes	No	Yes	1	Clinical consultation	749.722	619.334	130.388	No		41	stage-ii	Yes	No	yes	No	Yes	No	1
Regional Referral Hospital	Yes	No	Yes	1	Individual counselling	773.613	638.458	135.155	No		41	stage-i	Yes	No	yes	Yes	No	No	1
Regional Referral Hospital	Yes	No	Yes	0	Getting a Dispensing	797.505	657.582	139.923	Yes		41	Stage-i	Yes	No	yes	Yes	yes	No	1
Regional Referral Hospital	Yes	No	Yes	0	Laboratory blood draw	821.396	676.705	144.691	Yes		41	Stage-ii	Yes	No	yes	No	No	No	1
Regional Referral Hospital	Yes	No	Yes	1	Weighing, BP measurement	845.288	695.829	149.458	Yes		44	Stage-ii	Yes	No	yes	No	Yes	No	1
Regional Referral Hospital	Yes	No	No	1	Getting a TCA date	869.179	714.953	154.226	Yes		44	Stage-ii	Yes	No	yes	Yes	No	No	1
Regional Referral Hospital	Yes	No	No	1	Others (TB, STI screening, provision of FP services	893.071	734.077	158.994	No		50	Stage-i	Yes	No	yes	Yes	yes	No	1
Regional Referral Hospital	Yes	No	No	0	Drug refill	916.962	753.201	163.762	No		50	Stage-ii	Yes	No	yes	No	No	No	1
Regional Referral Hospital	Yes	No	No	0	Clinical consultation	940.854	772.325	168.529	No		62	Stage-ii	Yes	No	yes	Yes	Yes	No	1
Regional Referral Hospital	Yes	No	No	1	Individual counselling	964.745	791.448	173.297	No		63	Stage-ii	Yes	No	yes	Yes	No	No	1
Regional Referral Hospital	Yes	No	No	1	Getting a Dispensing	988.637	810.572	178.065	Yes		63	Stage-i	Yes	No	yes	No	yes	No	1
Regional Referral Hospital	Yes	No	No	1	Getting a TCA date	1012.53	829.696	182.832	No		54	Stage-i	Yes	No	yes	No	No	No	1
Regional Referral Hospital	Yes	No	No	1	Others (TB, STI screening, provision of FP services	1036.42	848.82	187.6	No		54	Stage-i	Yes	No	yes	Yes	Yes	No	1
Regional Referral Hospital	Yes	No	Yes	1	Drug refill	1060.31	867.944	192.368	No		0	Stage-i	Yes	No	yes	Yes	No	No	1
Regional Referral Hospital	Yes	No	Yes	11	Drug refill	1084.2	887.068	197.135	No		55	stage-ii	Yes	No	yes	No	yes	No	1
Regional Referral Hospital	Yes	No	Yes	1	Clinical consultation	1108.09	906.192	201.903	Yes		54	stage-i	Yes	No	yes	No	No	No	1
Regional Referral Hospital	Yes	No	Yes		Weighing, BP measurement	1131.99	925.315	206.671	Yes		55	Stage-i	Yes	No	yes	Yes	Yes	No	1
Regional Referral Hospital	Yes	No	Yes	1	Getting a TCA date	1155.88	944.439	211.438	Yes		54	Stage-ii	Yes	No	yes	Yes	No	No	1
Dispensary	No	Yes	Yes	1	Others (TB, STI screening, provision of FP services	1179.77	963.563	216.206	Yes		40	Stage-ii	Yes	No	yes	No	yes	No	1
Dispensary	No	Yes	No	1	Drug refill	1203.66	982.687	220.974	No		40	Stage-ii	Yes	No	yes	Yes	No	No	1
Dispensary	No	Yes	No	1	Clinical consultation	1227.55	1001.81	225.742	No		54	Stage-i	Yes	No	yes	Yes	Yes	No	1
Dispensary	No	Yes	No	0	Individual counselling	1251.44	1020.93	230.509	No		44	Stage-ii	Yes	No	yes	No	No	No	1
Dispensary	No	Yes	No	1	Clinical consultation	1275.34	1040.06	235.277	No		44	Stage-ii	Yes	No	yes	No	yes	No	1
Dispensary	No	Yes	No	1	Weighing, BP measurement	1299.23	1059.18	240.045	Yes		45	Stage-ii	Yes	No	yes	Yes	No	No	1
Dispensary	No	Yes	Yes	1	Drug refill	1323.12	1078.31	244.812	No		54	Stage-i	Yes	No	yes	Yes	Yes	No	1
Dispensary	No	Yes	Yes	1	Clinical consultation	1347.01	1097.43	249.58	No		40	Stage-i	Yes	No	yes	No	No	No	1
Dispensary	No	Yes	Yes	1	Individual counselling	1370.9	1116.55	254.348	No		29	Stage-i	Yes	No	yes	No	yes	No	1
Dispensary	No	Yes	Yes	1	Getting a Dispensing	1394.79	1135.68	259.115	No		50	Stage-i	Yes	No	yes	Yes	No	No	1
Dispensary	No	Yes	Yes	1	Laboratory blood draw	1418.68	1154.8	263.883	Yes		36	stage-ii	Yes	No	yes	Yes	Yes	No	1
Dispensary	No	Yes	Yes	0	Weighing, BP measurement	1442.58	1173.93	268.651	Yes		55	stage-i	Yes	No	yes	No	No	No	1
Dispensary	No	Yes	No	0	Getting a TCA date	1466.47	1193.05	273.418	Yes		42	Stage-i	No	Yes	yes	Yes	yes	No	1
Dispensary	No	Yes	No	0	Others (TB, STI screening, provision of FP services	1490.36	1212.17	278.186	Yes		32	Stage-ii	No	Yes	yes	Yes	No	No	1
Dispensary	No	Yes	No	1	Drug refill	1514.25	1231.3	282.954	No		35	Stage-ii	No	Yes	yes	No	Yes	No	1
Dispensary	No	Yes	No	1	Clinical consultation	1538.14	1250.42	287.722	No		42	Stage-ii	No	Yes	yes	No	No	No	1
Dispensary	No	Yes	No	0	Individual counselling	1562.03	1269.54	292.489	No		52	Stage-i	No	Yes	yes	Yes	yes	No	1
Dispensary	No	Yes	No	0	Getting a Dispensing	1585.93	1288.67	297.257	No		48	Stage-ii	No	Yes	yes	Yes	No	No	1
Dispensary	No	Yes	No	0	Getting a TCA date	1609.82	1307.79	302.025	Yes		43	Stage-ii	No	Yes	yes	No	Yes	No	1
Dispensary	No	Yes	No	1	Others (TB, STI screening, provision of FP services	1633.71	1326.92	306.792	No		45	Stage-ii	No	Yes	yes	No	No	No	1
Dispensary	No	Yes	Yes	0	Drug refill	1657.6	1346.04	311.56	No		53	Stage-i	No	Yes	yes	Yes	yes	No	1
Dispensary	No	Yes	Yes	1	Drug refill	1681.49	1365.16	316.328	No		57	Stage-i	No	Yes	yes	Yes	No	No	1
Dispensary	No	Yes	Yes	0	Clinical consultation	1705.38	1384.29	321.095	No		54	Stage-i	No	Yes	yes	No	Yes	No	1
Dispensary	No	Yes	Yes	1	Weighing, BP measurement	1729.27	1403.41	325.863	Yes		38	Stage-i	No	Yes	yes	Yes	No	No	1
Dispensary	No	Yes	Yes	0	Getting a TCA date	1753.17	1422.54	330.631	Yes		47	stage-ii	No	Yes	yes	Yes	yes	No	1
Dispensary	No	Yes	Yes	0	Others (TB, STI screening, provision of FP services	1777.06	1441.66	335.398	Yes		47	stage-i	No	Yes	yes	No	No	No	1
Dispensary	No	Yes	No	1	Drug refill	1800.95	1460.78	340.166	Yes		59	Stage-i	No	Yes	yes	No	Yes	No	1
Dispensary	No	Yes	No	1	Clinical consultation	1824.84	1479.91	344.934	No		45	Stage-ii	No	Yes	yes	Yes	No	No	1
Dispensary	No	Yes	No	1	Individual counselling	1848.73	1499.03	349.702	No		29	Stage-ii	No	Yes	yes	Yes	yes	No	1
Dispensary	No	Yes	No	1	Clinical consultation	1872.62	1518.15	354.469	No		0	Stage-ii	No	Yes	yes	No	No	No	1
Dispensary	No	Yes	No	1	Weighing, BP measurement	1896.52	1537.28	359.237	No		22	Stage-i	No	Yes	yes	No	Yes	No	1
Dispensary	No	Yes	Yes	No	Drug refill	1920.41	1556.4	364.005	Yes		52	Stage-ii	No	Yes	yes	Yes	No	No	1
Dispensary	No	Yes	Yes	1	Clinical consultation	1944.3	1575.53	368.772	No		38	Stage-ii	No	Yes	yes	Yes	yes	No	1
Dispensary	No	Yes	Yes	1	Individual counselling	1968.19	1594.65	373.54	No		53	Stage-ii	No	Yes	yes	No	No	No	1
Dispensary	No	Yes	Yes	1	Getting a Dispensing	1992.08	1613.77	378.308	No		40	Stage-i	No	Yes	yes	Yes	Yes	No	1
Dispensary	No	Yes	Yes	1	Laboratory blood draw	2015.97	1632.9	383.075	No		22	Stage-i	No	Yes	yes	Yes	No	No	1
Dispensary	No	Yes	Yes	1	Weighing, BP measurement	2039.86	1652.02	387.843	Yes		49	Stage-i	No	Yes	yes	No	yes	No	1
Dispensary	No	Yes	No	1	Getting a TCA date	2063.76	1671.15	392.611	Yes		78	Stage-i	No	Yes	yes	No	No	No	1
Dispensary	No	Yes	No	1	Others (TB, STI screening, provision of FP services	2087.65	1690.27	397.378	Yes		42	stage-ii	No	Yes	yes	Yes	Yes	No	1
Dispensary	No	Yes	No	1	Drug refill	2111.54	1709.39	402.146	Yes		27	stage-i	Yes	No	yes	Yes	No	No	1
Dispensary	No	Yes	No	1	Clinical consultation	2135.43	1728.52	406.914	No		26	Stage-i	No	Yes	yes	No	yes	No	1
Dispensary	No	Yes	No	Yes	Individual counselling	2159.32	1747.64	411.682	No		55	Stage-ii	Yes	No	yes	No	No	No	1
Dispensary	No	Yes	No	1	Getting a Dispensing	2183.21	1766.76	416.449	No		63	Stage-ii	Yes	No	yes	Yes	Yes	No	1
Dispensary	No	Yes	No	1	Getting a TCA date	2207.11	1785.89	421.217	No		99	Stage-ii	No	Yes	yes	Yes	No	No	1
Dispensary	No	Yes	No	1	Others (TB, STI screening, provision of FP services	2231	1805.01	425.985	Yes		99	Stage-i	No	Yes	No	No	yes	No	1
Dispensary	No	Yes	Yes	Yes	Drug refill	2254.89	1824.14	430.752	No		22	Stage-ii	Yes	No	No	Yes	No	No	1
Dispensary	No	Yes	Yes	1	Drug refill	2278.78	1843.26	435.52	No		42	Stage-ii	No	Yes	No	Yes	Yes	No	1
Dispensary	No	Yes	Yes	Yes	Clinical consultation	2302.67	1862.38	440.288	No		49	Stage-ii	Yes	No	No	No	No	No	1
Dispensary	No	Yes	Yes	1	Weighing, BP measurement	2326.56	1881.51	445.055	No		49	Stage-i	Yes	No	No	No	yes	No	1
Dispensary	No	Yes	Yes	1	Getting a TCA date	2350.45	1900.63	449.823	Yes		56	Stage-i	No	Yes	No	Yes	No	No	1
Dispensary	No	Yes	Yes	1	Others (TB, STI screening, provision of FP services	2374.35	1919.76	454.591	Yes		29	Stage-i	No	Yes	No	Yes	Yes	No	1
Dispensary	No	Yes	No	1	Drug refill	2398.24	1938.88	459.358	Yes		62	Stage-i	No	Yes	No	No	No	No	1
Dispensary	No	Yes	No	1	Clinical consultation	2422.13	1958	464.126	Yes		63	stage-ii	No	Yes	No	No	yes	No	1
Dispensary	No	Yes	No	1	Individual counselling	2446.02	1977.13	468.894	No		33	stage-i	No	Yes	No	Yes	No	No	1
Dispensary	No	Yes	No	1	Clinical consultation	2469.91	1996.25	473.662	No		63	Stage-i	No	Yes	No	Yes	Yes	No	1
Dispensary	No	Yes	No	0	Weighing, BP measurement	2493.8	2015.37	478.429	No		54	Stage-ii	Yes	No	No	No	No	No	1
Dispensary	No	Yes	Yes	0	Drug refill	2517.7	2034.5	483.197	No		34	Stage-ii	Yes	No	No	Yes	yes	No	1
Dispensary	No	Yes	Yes	1	Clinical consultation	2541.59	2053.62	487.965	Yes		32	Stage-ii	Yes	No	No	Yes	No	No	1
Dispensary	No	Yes	Yes	0	Individual counselling	2565.48	2072.75	492.732	No		39	Stage-i	Yes	No	No	No	Yes	No	1
Dispensary	No	Yes	Yes	1	Getting a Dispensing	2589.37	2091.87	497.5	No		63	Stage-ii	Yes	No	No	No	No	No	1
Dispensary	No	Yes	Yes	0	Laboratory blood draw	2613.26	2110.99	502.268	No		54	Stage-ii	Yes	No	No	Yes	yes	No	1
Dispensary	No	Yes	Yes	1	Weighing, BP measurement	2637.15	2130.12	507.035	No		45	Stage-ii	No	Yes	No	Yes	No	No	1
Dispensary	No	Yes	No	1	Getting a TCA date	2661.04	2149.24	511.803	Yes		52	Stage-i	Yes	No	No	No	Yes	No	1
Dispensary	No	Yes	No	1	Others (TB, STI screening, provision of FP services	2684.94	2168.37	516.571	Yes		40	Stage-i	Yes	No	No	No	No	No	1
Dispensary	No	Yes	No	1	Drug refill	2708.83	2187.49	521.338	Yes		47	Stage-i	Yes	No	No	Yes	yes	No	1
Dispensary	No	Yes	No	0	Clinical consultation	2732.72	2206.61	526.106	Yes		34	Stage-i	Yes	No	No	Yes	No	No	1
Dispensary	No	Yes	No	1	Individual counselling	2756.61	2225.74	530.874	No		46	stage-ii	Yes	No	No	No	Yes	No	1
Dispensary	No	Yes	No	1	Getting a Dispensing	2780.5	2244.86	535.642	No		41	stage-i	No	No	No	Yes	No	No	1
Dispensary	No	Yes	No	1	Getting a TCA date	2804.39	2263.98	540.409	No		47	Stage-i	No	Yes	No	Yes	yes	No	1
Dispensary	No	Yes	No	No	Others (TB, STI screening, provision of FP services	2828.29	2283.11	545.177	No		55	Stage-ii	Yes	No	No	No	No	No	1
Dispensary	No	Yes	Yes	0.838235	Drug refill	2852.18	2302.23	549.945	Yes		50	Stage-ii	No	Yes	No	No	Yes	No	1
Dispensary	No	Yes	Yes	0.852941	Drug refill	2876.07	2321.36	554.712	No		48	Stage-ii	Yes	No	No	Yes	No	No	1
Dispensary	No	Yes	Yes	0.867647	Clinical consultation	2899.96	2340.48	559.48	No		40	Stage-i	Yes	No	No	Yes	yes	No	1
Dispensary	No	Yes	Yes	0.882353	Weighing, BP measurement	2923.85	2359.6	564.248	No		19	Stage-ii	Yes	No	No	No	No	No	1
Dispensary	No	Yes	Yes	0.897059	Getting a TCA date	2947.74	2378.73	569.015	No		18	Stage-ii	Yes	No	No	No	Yes	No	2
Dispensary	No	Yes	Yes	0.911765	Others (TB, STI screening, provision of FP services	2971.63	2397.85	573.783	Yes		72	Stage-ii	Yes	No	No	Yes	No	No	1
Dispensary	No	Yes	No	0.926471	Drug refill	2995.53	2416.98	578.551	Yes		42	Stage-i	No	Yes	No	Yes	yes	No	1
Dispensary	No	Yes	No	0.941176	Clinical consultation	3019.42	2436.1	583.318	Yes		44	Stage-i	No	Yes	No	No	No	No	2
Dispensary	No	Yes	No	0.955882	Individual counselling	3043.31	2455.22	588.086	Yes		36	Stage-i	Yes	No	No	Yes	Yes	No	1
Dispensary	No	Yes	No	0.970588	Clinical consultation	3067.2	2474.35	592.854	No		49	Stage-i	No	Yes	No	Yes	No	No	1
Dispensary	No	Yes	No	0.985294	Weighing, BP measurement	3091.09	2493.47	597.622	No		55	stage-ii	Yes	No	No	No	yes	No	2
Dispensary	No	Yes	Yes	1	Drug refill	3114.98	2512.59	602.389	No		40	stage-i	Yes	No	No	No	No	No	1
Dispensary	No	Yes	Yes	1.01471	Clinical consultation	3138.88	2531.72	607.157	No		46	Stage-i	Yes	No	No	Yes	Yes	No	1
Dispensary	No	Yes	Yes	1.02941	Individual counselling	3162.77	2550.84	611.925	Yes		43	Stage-ii	Yes	No	No	Yes	No	No	1
Dispensary	No	Yes	Yes	1.04412	Getting a Dispensing	3186.66	2569.97	616.692	No		23	Stage-ii	Yes	No	No	No	yes	No	1
Dispensary	No	Yes	Yes	1.05882	Laboratory blood draw	3210.55	2589.09	621.46	No		24	Stage-ii	No	Yes	No	No	No	No	1
Dispensary	No	Yes	Yes	1.07353	Weighing, BP measurement	3234.44	2608.21	626.228	No		29	Stage-i	No	Yes	No	Yes	Yes	No	1
Dispensary	No	Yes	No	No	Getting a TCA date	3258.33	2627.34	630.995	No		55	Stage-ii	Yes	No	No	Yes	No	No	1
Dispensary	No	Yes	No	1.08824	Others (TB, STI screening, provision of FP services	3282.22	2646.46	635.763	Yes		56	Stage-ii	No	Yes	No	No	yes	No	1
Dispensary	No	Yes	No	1.10294	Drug refill	3306.12	2665.59	640.531	Yes		50	Stage-ii	Yes	No	No	Yes	No	No	1
Dispensary	No	Yes	No	1.11765	Clinical consultation	3330.01	2684.71	645.298	Yes		39	Stage-i	Yes	No	No	Yes	Yes	No	1
Dispensary	No	Yes	No	1.13235	Individual counselling	3353.9	2703.83	650.066	Yes		48	Stage-i	Yes	No	No	No	No	No	1
Dispensary	No	Yes	No	1.14706	Getting a Dispensing	3377.79	2722.96	654.834	No		50	Stage-i	Yes	No	No	No	yes	No	1
Dispensary	No	Yes	No	1.16176	Getting a TCA date	3401.68	2742.08	659.602	No		46	Stage-i	Yes	No	No	Yes	No	No	1
Dispensary	No	Yes	No	1.17647	Others (TB, STI screening, provision of FP services	3425.57	2761.2	664.369	No		45	stage-ii	No	Yes	No	Yes	Yes	No	1
Dispensary	No	Yes	Yes	1.19118	Drug refill	3449.47	2780.33	669.137	No		52	stage-i	No	Yes	No	No	No	No	1
Dispensary	No	Yes	Yes	1.20588	Drug refill	3473.36	2799.45	673.905	Yes		50	Stage-i	Yes	Yes	No	No	yes	No	1
Dispensary	No	Yes	Yes	1.22059	Clinical consultation	3497.25	2818.58	678.672	No		26	Stage-ii	No	Yes	No	Yes	No	No	1
Dispensary	No	Yes	Yes	1.23529	Weighing, BP measurement	3521.14	2837.7	683.44	No		54	Stage-ii	Yes	No	No	Yes	Yes	No	1
Dispensary	No	Yes	Yes	1.25	Getting a TCA date	3545.03	2856.82	688.208	No		25	Stage-ii	Yes	No	No	No	No	No	1
Dispensary	No	Yes	Yes	1.26471	Others (TB, STI screening, provision of FP services	3568.92	2875.95	692.975	No		35	Stage-i	Yes	No	Yes	Yes	yes	No	1
Dispensary	No	Yes	No	1.27941	Drug refill	3592.81	2895.07	697.743	Yes		55	Stage-ii	Yes	No	No	Yes	No	No	1
Dispensary	No	Yes	No	1.29412	Clinical consultation	3616.71	2914.2	702.511	Yes		42	Stage-ii	Yes	No	No	No	Yes	No	1
Dispensary	No	Yes	No	1.30882	Individual counselling	3640.6	2933.32	707.278	Yes		60	Stage-ii	No	Yes	No	No	No	No	1
Dispensary	No	Yes	No	1.32353	Clinical consultation	3664.49	2952.44	712.046	Yes		24	Stage-i	No	Yes	Yes	Yes	yes	No	1
Dispensary	No	Yes	No	No	Weighing, BP measurement	3688.38	2971.57	716.814	No		40	Stage-i	No	Yes	No	Yes	No	No	1
Dispensary	No	Yes	Yes	1.33824	Drug refill	3712.27	2990.69	721.582	No		45	Stage-i	No	Yes	No	No	Yes	No	1
Dispensary	No	Yes	Yes	1.35294	Clinical consultation	3736.16	3009.81	726.349	No		19	Stage-ii	Yes	No	No	No	No	No	1
Dispensary	No	Yes	Yes	1.36765	Individual counselling	3760.06	3028.94	731.117	No		22	Stage-ii	No	Yes	Yes	Yes	yes	No	1
Dispensary	No	Yes	Yes	1.38235	Getting a Dispensing	3783.95	3048.06	735.885	Yes		27	Stage-ii	Yes	No	No	Yes	No	No	1
Dispensary	No	Yes	Yes	1.39706	Laboratory blood draw	3807.84	3067.19	740.652	No		31	Stage-i	No	Yes	No	No	Yes	No	1
Dispensary	No	Yes	Yes	1.41176	Weighing, BP measurement	3831.73	3086.31	745.42	No		54	Stage-ii	No	Yes	No	Yes	No	No	1
Dispensary	No	Yes	No	1.42647	Getting a TCA date	3855.62	3105.43	750.188	No		61	Stage-ii	No	Yes	Yes	Yes	yes	No	1
Dispensary	No	Yes	No	1.44118	Others (TB, STI screening, provision of FP services	3879.51	3124.56	754.955	No		47	Stage-ii	No	Yes	No	No	No	No	1
Dispensary	No	Yes	No	1.45588	Drug refill	3903.4	3143.68	759.723	Yes		48	Stage-i	No	Yes	No	No	Yes	No	1
Dispensary	No	Yes	No	1.47059	Clinical consultation	3927.3	3162.81	764.491	Yes		36	Stage-i	No	Yes	No	Yes	No	No	1
Dispensary	No	Yes	No	1.48529	Individual counselling	3951.19	3181.93	769.258	Yes		46	Stage-i	Yes	No	Yes	Yes	yes	No	1
Dispensary	No	Yes	No	1.5	Getting a Dispensing	3975.08	3201.05	774.026	Yes		45	Stage-i	Yes	No	No	No	No	No	1
Dispensary	No	Yes	No	1.51471	Getting a TCA date	3998.97	3220.18	778.794	No		72	stage-ii	Yes	No	No	No	Yes	No	1
Dispensary	No	Yes	No	1.52941	Others (TB, STI screening, provision of FP services	4022.86	3239.3	783.562	No		41	stage-i	Yes	No	No	Yes	No	No	1
Dispensary	No	Yes	Yes	1.54412	Drug refill	4046.75	3258.42	788.329	No		35	Stage-i	Yes	No	Yes	Yes	yes	No	1
Dispensary	No	Yes	Yes	1.55882	Drug refill	4070.65	3277.55	793.097	No		52	Stage-ii	Yes	No	No	No	No	No	1
Dispensary	No	Yes	Yes	1.57353	Clinical consultation	4094.54	3296.67	797.865	Yes		41	Stage-ii	Yes	No	No	Yes	Yes	No	1
Dispensary	No	Yes	Yes	No	Weighing, BP measurement	4118.43	3315.8	802.632	No		41	Stage-ii	No	Yes	No	Yes	No	No	2
Dispensary	No	Yes	Yes	1.58824	Getting a TCA date	4142.32	3334.92	807.4	No		55	Stage-i	No	Yes	Yes	No	yes	No	2
Dispensary	No	Yes	Yes	1.60294	Others (TB, STI screening, provision of FP services	4166.21	3354.04	812.168	No		56	Stage-ii	No	Yes	No	No	No	No	2
Dispensary	No	Yes	No	1.61765	Drug refill	4190.1	3373.17	816.935	No		23	Stage-ii	No	Yes	No	Yes	Yes	No	2
Dispensary	No	Yes	No	1.63235	Clinical consultation	4213.99	3392.29	821.703	Yes		39	Stage-ii	No	Yes	No	Yes	No	No	2
Dispensary	No	Yes	No	1.64706	Individual counselling	4237.89	3411.42	826.471	Yes		53	Stage-i	No	Yes	Yes	No	yes	No	2
Dispensary	No	Yes	No	1.66176	Clinical consultation	4261.78	3430.54	831.238	Yes		53	Stage-i	No	Yes	No	No	No	No	2
Dispensary	No	Yes	No	1.67647	Weighing, BP measurement	4285.67	3449.66	836.006	Yes		51	Stage-i	No	Yes	No	Yes	Yes	No	2
Dispensary	No	Yes	Yes	1.69118	Drug refill	4309.56	3468.79	840.774	No		22	Stage-i	No	Yes	No	Yes	No	No	2
Dispensary	No	Yes	Yes	1.70588	Clinical consultation	4333.45	3487.91	845.542	No		52	stage-ii	Yes	No	Yes	No	yes	No	2
Dispensary	No	Yes	Yes	1.72059	Individual counselling	4357.34	3507.03	850.309	No		60	stage-i	Yes	No	No	Yes	No	No	2
Dispensary	No	Yes	Yes	1.73529	Getting a Dispensing	4381.24	3526.16	855.077	No		45	Stage-i	Yes	No	No	Yes	Yes	No	2
Dispensary	No	Yes	Yes	1.75	Laboratory blood draw	4405.13	3545.28	859.845	Yes		42	Stage-ii	Yes	No	No	No	No	No	2
Dispensary	No	Yes	Yes	1.76471	Weighing, BP measurement	4429.02	3564.41	864.612	No		43.7806	Stage-ii	Yes	No	Yes	No	yes	No	2
Dispensary	No	Yes	No	1.77941	Getting a TCA date	4452.91	3583.53	869.38	No		43.7688	Stage-ii	Yes	No	No	Yes	No	No	2
Dispensary	No	Yes	No	1.79412	Others (TB, STI screening, provision of FP services	4476.8	3602.65	874.148	No		43.757	Stage-i	No	Yes	No	Yes	Yes	No	2
Dispensary	No	Yes	No	1.80882	Drug refill	4500.69	3621.78	878.915	No		43.7452	Stage-ii	Yes	No	No	No	No	No	2
Dispensary	No	Yes	No	1.82353	Clinical consultation	4524.58	3640.9	883.683	Yes		43.7334	Stage-ii	Yes	No	Yes	No	yes	No	2
Dispensary	No	Yes	No	1	Individual counselling	4548.48	3660.03	888.451	Yes		43.7216	Stage-ii	Yes	No	No	Yes	No	No	2
Dispensary	No	Yes	No	1.83824	Getting a Dispensing	4572.37	3679.15	893.218	Yes		43.7097	Stage-i	Yes	No	No	Yes	Yes	No	2
Dispensary	No	Yes	No	1.85294	Getting a TCA date	4596.26	3698.27	897.986	Yes		43.6979	Stage-i	Yes	No	No	No	No	No	2
Dispensary	No	Yes	No	1.86765	Others (TB, STI screening, provision of FP services	4620.15	3717.4	902.754	No		43.6861	Stage-i	No	No	Yes	Yes	yes	No	2
Dispensary	No	Yes	Yes	1.88235	Drug refill	4644.04	3736.52	907.522	No		43.6743	Stage-i	No	Yes	No	Yes	No	No	2
Dispensary	No	Yes	Yes	1.89706	Drug refill	4667.93	3755.64	912.289	No		43.6625	stage-ii	Yes	No	No	No	Yes	No	2
Dispensary	No	Yes	Yes	1.91176	Clinical consultation	4691.83	3774.77	917.057	No		43.6507	stage-i	No	Yes	No	No	No	No	2
Dispensary	No	Yes	Yes	1.92647	Weighing, BP measurement	4715.72	3793.89	921.825	Yes		43.6388	Stage-i	Yes	No	Yes	Yes	yes	No	2
Dispensary	No	Yes	Yes	1.94118	Getting a TCA date	4739.61	3813.02	926.592	No		43.627	Stage-ii	Yes	No	No	Yes	No	No	2
Dispensary	No	Yes	Yes	1.95588	Others (TB, STI screening, provision of FP services	4763.5	3832.14	931.36	No		43.6152	Stage-ii	Yes	No	No	No	Yes	No	2
Dispensary	No	Yes	No	1.97059	Drug refill	4787.39	3851.26	936.128	No		43.6034	Stage-ii	Yes	No	No	No	No	No	2
Dispensary	No	Yes	No	1.98529	Clinical consultation	4811.28	3870.39	940.895	No		43.5916	Stage-i	Yes	No	Yes	Yes	yes	No	2
Dispensary	No	Yes	No	2	Individual counselling	4835.17	3889.51	945.663	Yes		43.5798	Stage-ii	No	Yes	No	Yes	No	No	2
Dispensary	No	Yes	No	2.01471	Clinical consultation	4859.07	3908.64	950.431	Yes		43.5679	Stage-ii	No	Yes	No	No	Yes	No	2
Dispensary	No	Yes	No	2.02941	Weighing, BP measurement	4882.96	3927.76	955.198	Yes		43.5561	Stage-ii	Yes	No	No	Yes	No	No	2
Dispensary	No	Yes	Yes	2.04412	Drug refill	4906.85	3946.88	959.966	Yes		43.5443	Stage-i	No	Yes	Yes	Yes	yes	No	2
Dispensary	No	Yes	Yes	2.05882	Clinical consultation	4930.74	3966.01	964.734	No		43.5325	Stage-i	Yes	No	No	No	No	No	2
Dispensary	No	Yes	Yes	2.07353	Individual counselling	4954.63	3985.13	969.502	No		43.5207	Stage-i	Yes	No	No	No	Yes	No	2
Dispensary	No	Yes	Yes	0	Getting a Dispensing	4978.52	4004.25	974.269	No		43.5089	Stage-i	Yes	No	No	Yes	No	No	2
Dispensary	No	Yes	Yes	2.08824	Laboratory blood draw	5002.42	4023.38	979.037	No		43.497	stage-ii	Yes	No	Yes	Yes	yes	No	2
Dispensary	No	Yes	Yes	2.10294	Weighing, BP measurement	5026.31	4042.5	983.805	Yes		43.4852	stage-i	Yes	No	No	No	No	No	2
Dispensary	No	Yes	No	2.11765	Getting a TCA date	5050.2	4061.63	988.572	No		43.4734	Stage-i	No	Yes	No	No	Yes	No	2
Dispensary	No	Yes	No	2.13235	Others (TB, STI screening, provision of FP services	5074.09	4080.75	993.34	No		43.4616	Stage-ii	No	Yes	No	Yes	No	No	2
Dispensary	No	Yes	No	2.14706	Drug refill	5097.98	4099.87	998.108	No		43.4498	Stage-ii	Yes	No	Yes	Yes	yes	No	2
Dispensary	No	Yes	No	2.16176	Clinical consultation	5121.87	4119	1002.88	No		43.438	Stage-ii	No	Yes	No	No	No	No	2
Dispensary	No	Yes	No	2.17647	Individual counselling	5145.76	4138.12	1007.64	Yes		43.4261	Stage-i	Yes	No	No	Yes	Yes	No	2
Dispensary	No	Yes	No	2.19118	Getting a Dispensing	5169.66	4157.25	1012.41	Yes		43.4143	Stage-ii	Yes	No	No	Yes	No	No	2
Dispensary	No	Yes	No	2.20588	Getting a TCA date	5193.55	4176.37	1017.18	Yes		43.4025	Stage-ii	Yes	No	Yes	No	yes	No	2
Dispensary	No	Yes	No	2.22059	Others (TB, STI screening, provision of FP services	5217.44	4195.49	1021.95	Yes		43.3907	Stage-ii	Yes	No	No	No	No	No	2
Dispensary	No	Yes	Yes	2.23529	Drug refill	5241.33	4214.62	1026.71	No		43.3789	Stage-i	Yes	No	No	Yes	Yes	No	2
Dispensary	No	Yes	Yes	2.25	Drug refill	5265.22	4233.74	1031.48	No		43.3671	Stage-i	No	Yes	No	Yes	No	No	2
Dispensary	No	Yes	Yes	2.26471	Clinical consultation	5289.11	4252.86	1036.25	No		43.3552	Stage-i	No	Yes	Yes	No	yes	No	2
Dispensary	No	Yes	Yes	2.27941	Weighing, BP measurement	5313.01	4271.99	1041.02	No		43.3434	Stage-i	Yes	Yes	No	No	No	No	2
Dispensary	No	Yes	Yes	2.29412	Getting a TCA date	5336.9	4291.11	1045.78	Yes		43.3316	stage-ii	No	Yes	No	Yes	Yes	No	2
Dispensary	No	Yes	Yes	2.30882	Others (TB, STI screening, provision of FP services	5360.79	4310.24	1050.55	No		43.3198	stage-i	Yes	No	No	Yes	No	No	2
Dispensary	No	Yes	No	2.32353	Drug refill	5384.68	4329.36	1055.32	No		43.308	Stage-i	Yes	No	Yes	No	yes	No	2
Dispensary	No	Yes	No	1	Clinical consultation	5408.57	4348.48	1060.09	No		43.2962	Stage-ii	Yes	No	No	Yes	No	No	2
Dispensary	No	Yes	No	2.33824	Individual counselling	5432.46	4367.61	1064.86	No		43.2844	Stage-ii	Yes	No	No	Yes	Yes	No	2
Dispensary	No	Yes	No	2.35294	Clinical consultation	5456.35	4386.73	1069.62	Yes		43.2725	Stage-ii	Yes	No	No	No	No	No	2
Dispensary	No	Yes	No	2.36765	Weighing, BP measurement	5480.25	4405.86	1074.39	Yes		43.2607	Stage-i	No	Yes	Yes	No	yes	No	2
Dispensary	No	Yes	Yes	2.38235	Drug refill	5504.14	4424.98	1079.16	Yes		43.2489	Stage-ii	No	Yes	No	Yes	No	No	2
Dispensary	No	Yes	Yes	2.39706	Clinical consultation	5528.03	4444.1	1083.93	Yes		43.2371	Stage-ii	No	Yes	No	Yes	Yes	No	2
Dispensary	No	Yes	Yes	2.41176	Individual counselling	5551.92	4463.23	1088.69	No		43.2253	Stage-ii	No	Yes	No	No	No	No	2
Dispensary	No	Yes	Yes	2.42647	Getting a Dispensing	5575.81	4482.35	1093.46	No		43.2135	Stage-i	Yes	No	Yes	No	yes	No	2
Dispensary	No	Yes	Yes	2.44118	Laboratory blood draw	5599.7	4501.47	1098.23	No		43.2016	Stage-i	No	Yes	No	Yes	No	No	2
Dispensary	No	Yes	Yes	2.45588	Weighing, BP measurement	5623.6	4520.6	1103	No		43.1898	Stage-i	Yes	No	No	Yes	Yes	No	2
Dispensary	No	Yes	No	2.47059	Getting a TCA date	5647.49	4539.72	1107.76	Yes		43.178	Stage-i	No	Yes	No	No	No	No	2
Dispensary	No	Yes	No	2.48529	Others (TB, STI screening, provision of FP services	5671.38	4558.85	1112.53	No		43.1662	stage-ii	No	Yes	Yes	Yes	yes	No	2
Dispensary	No	Yes	No	2.5	Drug refill	5695.27	4577.97	1117.3	No		43.1544	stage-i	No	Yes	No	Yes	No	No	2
Dispensary	No	Yes	No	2.51471	Clinical consultation	5719.16	4597.09	1122.07	No		43.1426	Stage-i	No	Yes	No	No	Yes	No	2
Dispensary	No	Yes	No	2.52941	Individual counselling	5743.05	4616.22	1126.84	No		43.1307	Stage-ii	No	Yes	No	No	No	No	2
Dispensary	No	Yes	No	2.54412	Getting a Dispensing	5766.94	4635.34	1131.6	Yes		43.1189	Stage-ii	No	Yes	Yes	Yes	yes	No	2
Dispensary	No	Yes	No	2.55882	Getting a TCA date	5790.84	4654.47	1136.37	Yes		43.1071	Stage-ii	Yes	No	No	Yes	No	No	2
Dispensary	No	Yes	No	2.57353	Others (TB, STI screening, provision of FP services	5814.73	4673.59	1141.14	Yes		43.0953	Stage-i	Yes	No	No	No	Yes	No	2
Dispensary	No	Yes	Yes	0	Drug refill	5838.62	4692.71	1145.91	Yes		43.0835	Stage-ii	Yes	No	No	No	No	No	2
Dispensary	No	Yes	Yes	2.58824	Drug refill	5862.51	4711.84	1150.67	No		43.0717	Stage-ii	Yes	No	Yes	Yes	yes	No	2
Dispensary	No	Yes	Yes	2.60294	Clinical consultation	5886.4	4730.96	1155.44	No		43.0598	Stage-ii	Yes	No	No	Yes	No	No	2
Dispensary	No	Yes	Yes	2.61765	Weighing, BP measurement	5910.29	4750.08	1160.21	No		43.048	Stage-i	Yes	No	No	No	Yes	No	2
Dispensary	No	Yes	Yes	2.63235	Getting a TCA date	5934.19	4769.21	1164.98	No		43.0362	Stage-i	Yes	No	No	Yes	No	No	2
Dispensary	No	Yes	Yes	2.64706	Others (TB, STI screening, provision of FP services	5958.08	4788.33	1169.74	Yes		43.0244	Stage-i	No	Yes	Yes	Yes	yes	No	2
Dispensary	No	Yes	No	2.66176	Drug refill	5981.97	4807.46	1174.51	No		43.0126	Stage-i	No	Yes	No	No	No	No	2
Dispensary	No	Yes	No	2.67647	Clinical consultation	6005.86	4826.58	1179.28	No		43.0008	stage-ii	No	Yes	No	No	Yes	No	2
Dispensary	No	Yes	No	2.69118	Individual counselling	6029.75	4845.7	1184.05	No		42.9889	stage-i	No	Yes	No	Yes	No	No	2
Dispensary	No	Yes	No	2.70588	Clinical consultation	6053.64	4864.83	1188.82	No		42.9771	Stage-i	No	Yes	Yes	Yes	yes	No	2
Dispensary	No	Yes	No	2.72059	Weighing, BP measurement	6077.53	4883.95	1193.58	Yes		42.9653	Stage-ii	No	Yes	No	No	No	No	2
Dispensary	No	Yes	Yes	2.73529	Drug refill	6101.43	4903.08	1198.35	Yes		42.9535	Stage-ii	No	Yes	No	No	Yes	No	2
Dispensary	No	Yes	Yes	2.75	Clinical consultation	6125.32	4922.2	1203.12	Yes		42.9417	Stage-ii	No	Yes	No	Yes	No	No	2
Dispensary	No	Yes	Yes	2.76471	Individual counselling	6149.21	4941.32	1207.89	Yes		42.9299	Stage-i	No	Yes	Yes	Yes	yes	No	2
Dispensary	No	Yes	Yes	2.77941	Getting a Dispensing	6173.1	4960.45	1212.65	No		42.918	Stage-ii	Yes	No	No	No	No	No	2
Dispensary	No	Yes	Yes	2.79412	Laboratory blood draw	6196.99	4979.57	1217.42	No		42.9062	Stage-ii	Yes	No	No	Yes	Yes	No	2
Dispensary	No	Yes	Yes	2.80882	Weighing, BP measurement	6220.88	4998.69	1222.19	No		42.8944	Stage-ii	Yes	No	No	Yes	No	No	2
Dispensary	No	Yes	No	2.82353	Getting a TCA date	6244.78	5017.82	1226.96	No		42.8826	Stage-i	Yes	No	Yes	No	yes	No	2
Dispensary	No	Yes	No	No	Others (TB, STI screening, provision of FP services	6268.67	5036.94	1231.72	Yes		42.8708	Stage-i	Yes	No	No	No	No	No	2
Dispensary	No	Yes	No	2.83824	Drug refill	6292.56	5056.07	1236.49	No		42.859	Stage-i	Yes	No	No	Yes	Yes	No	2
Dispensary	No	Yes	No	2.85294	Clinical consultation	6316.45	5075.19	1241.26	No		42.8472	Stage-i	No	Yes	No	Yes	No	No	2
Dispensary	No	Yes	No	2.86765	Individual counselling	6340.34	5094.31	1246.03	No		42.8353	stage-ii	Yes	No	Yes	No	yes	No	2
Dispensary	No	Yes	No	2.88235	Getting a Dispensing	6364.23	5113.44	1250.8	No		42.8235	stage-i	Yes	No	No	No	No	No	2
Dispensary	No	Yes	No	2.89706	Getting a TCA date	6388.12	5132.56	1255.56	Yes		42.8117	Stage-i	Yes	No	No	Yes	Yes	No	2
Dispensary	No	Yes	No	2.91176	Others (TB, STI screening, provision of FP services	6412.02	5151.69	1260.33	Yes		42.7999	Stage-ii	Yes	No	No	Yes	No	No	2
Dispensary	No	Yes	Yes	2.92647	Drug refill	6435.91	5170.81	1265.1	Yes		42.7881	Stage-ii	Yes	No	Yes	No	yes	No	2
Dispensary	No	Yes	Yes	2.94118	Drug refill	6459.8	5189.93	1269.87	Yes		42.7763	Stage-ii	No	No	No	Yes	No	No	2
Dispensary	No	Yes	Yes	2.95588	Clinical consultation	6483.69	5209.06	1274.63	No		42.7644	Stage-i	No	Yes	No	Yes	Yes	No	2
Dispensary	No	Yes	Yes	2.97059	Weighing, BP measurement	6507.58	5228.18	1279.4	No		42.7526	Stage-ii	Yes	No	No	No	No	No	2
Dispensary	No	Yes	Yes	2.98529	Getting a TCA date	6531.47	5247.3	1284.17	No		42.7408	Stage-ii	No	Yes	Yes	No	yes	No	2
Dispensary	No	Yes	Yes	3	Others (TB, STI screening, provision of FP services	6555.37	5266.43	1288.94	No		42.729	Stage-ii	Yes	No	No	Yes	No	No	2
Dispensary	No	Yes	No	3.01471	Drug refill	6579.26	5285.55	1293.7	Yes		42.7172	Stage-i	Yes	No	No	Yes	Yes	No	2
Dispensary	No	Yes	No	3.02941	Clinical consultation	6603.15	5304.68	1298.47	No		42.7054	Stage-i	Yes	No	No	No	No	No	2
Dispensary	No	Yes	No	3.04412	Individual counselling	6627.04	5323.8	1303.24	No		42.6935	Stage-i	Yes	No	Yes	No	yes	No	2
Dispensary	No	Yes	No	3.05882	Clinical consultation	6650.93	5342.92	1308.01	No		42.6817	Stage-i	Yes	No	No	Yes	No	No	2
Dispensary	No	Yes	No	3.07353	Weighing, BP measurement	6674.82	5362.05	1312.78	No		42.6699	stage-ii	No	Yes	No	Yes	Yes	No	2
Dispensary	No	Yes	Yes	No	Drug refill	6698.71	5381.17	1317.54	Yes		42.6581	stage-i	No	Yes	No	No	No	No	2
Dispensary	No	Yes	Yes	3.08824	Clinical consultation	6722.61	5400.3	1322.31	Yes		42.6463	Stage-i	Yes	No	Yes	Yes	yes	No	2
Dispensary	No	Yes	Yes	3.10294	Individual counselling	6746.5	5419.42	1327.08	Yes		42.6345	Stage-ii	No	Yes	No	Yes	No	No	2
Dispensary	No	Yes	Yes	3.11765	Getting a Dispensing	6770.39	5438.54	1331.85	Yes		42.6226	Stage-ii	Yes	No	No	No	Yes	No	2
Dispensary	No	Yes	Yes	3.13235	Laboratory blood draw	6794.28	5457.67	1336.61	No		42.6108	Stage-ii	Yes	No	No	No	No	No	2
Dispensary	No	Yes	Yes	3.14706	Weighing, BP measurement	6818.17	5476.79	1341.38	No		42.599	Stage-i	Yes	No	Yes	Yes	yes	No	2
Dispensary	No	Yes	No	3.16176	Getting a TCA date	6842.06	5495.91	1346.15	No		42.5872	Stage-ii	Yes	No	No	Yes	No	No	2
Dispensary	No	Yes	No	3.17647	Others (TB, STI screening, provision of FP services	6865.96	5515.04	1350.92	No		42.5754	Stage-ii	Yes	No	No	No	Yes	No	2
Dispensary	No	Yes	No	3.19118	Drug refill	6889.85	5534.16	1355.68	Yes		42.5636	Stage-ii	No	Yes	No	No	No	No	2
Dispensary	No	Yes	No	3.20588	Clinical consultation	6913.74	5553.29	1360.45	No		42.5517	Stage-i	No	Yes	Yes	Yes	yes	No	2
Dispensary	No	Yes	No	3.22059	Individual counselling	6937.63	5572.41	1365.22	No		42.5399	Stage-i	Yes	No	No	Yes	No	No	2
Dispensary	No	Yes	No	3.23529	Getting a Dispensing	6961.52	5591.53	1369.99	No		42.5281	Stage-i	No	Yes	No	No	Yes	No	2
Dispensary	No	Yes	No	3.25	Getting a TCA date	6985.41	5610.66	1374.76	No		42.5163	Stage-i	Yes	No	No	Yes	No	No	2
Dispensary	No	Yes	No	3.26471	Others (TB, STI screening, provision of FP services	7009.3	5629.78	1379.52	Yes		42.5045	stage-ii	Yes	No	Yes	Yes	yes	No	2
Dispensary	No	Yes	Yes	3.27941	Drug refill	7033.2	5648.91	1384.29	Yes		42.4927	stage-i	Yes	No	No	No	No	No	2
Dispensary	No	Yes	Yes	3.29412	Drug refill	7057.09	5668.03	1389.06	Yes		42.4809	Stage-i	Yes	No	No	No	Yes	No	2
Dispensary	No	Yes	Yes	3.30882	Clinical consultation	7080.98	5687.15	1393.83	Yes		42.469	Stage-ii	Yes	No	No	Yes	No	No	2
Dispensary	No	Yes	Yes	3.32353	Weighing, BP measurement	7104.87	5706.28	1398.59	No		42.4572	Stage-ii	No	Yes	Yes	Yes	yes	No	2
Dispensary	No	Yes	Yes	1	Getting a TCA date	7128.76	5725.4	1403.36	No		42.4454	Stage-ii	No	Yes	No	No	No	No	2
Dispensary	No	Yes	Yes	3.33824	Others (TB, STI screening, provision of FP services	7152.65	5744.52	1408.13	No		42.4336	Stage-i	Yes	Yes	No	No	Yes	No	2
Dispensary	No	Yes	No	3.35294	Drug refill	7176.55	5763.65	1412.9	No		42.4218	Stage-ii	No	Yes	No	Yes	No	No	2
Dispensary	No	Yes	No	3.36765	Clinical consultation	7200.44	5782.77	1417.66	Yes		42.41	Stage-ii	Yes	No	Yes	Yes	yes	No	2
Dispensary	No	Yes	No	3.38235	Individual counselling	7224.33	5801.9	1422.43	No		42.3981	Stage-ii	Yes	No	No	No	No	No	2
Dispensary	No	Yes	No	3.39706	Clinical consultation	7248.22	5821.02	1427.2	No		42.3863	Stage-i	Yes	No	No	Yes	Yes	No	2
Dispensary	No	Yes	No	3.41176	Weighing, BP measurement	7272.11	5840.14	1431.97	No		42.3745	Stage-i	Yes	No	No	Yes	No	No	2
Dispensary	No	Yes	Yes	3.42647	Drug refill	7296	5859.27	1436.74	No		42.3627	Stage-i	Yes	No	Yes	No	yes	No	2
Dispensary	No	Yes	Yes	3.44118	Clinical consultation	7319.89	5878.39	1441.5	Yes		42.3509	Stage-ii	No	Yes	No	No	No	No	2
Dispensary	No	Yes	Yes	3.45588	Individual counselling	7343.79	5897.52	1446.27	Yes		42.3391	Stage-ii	No	Yes	No	Yes	Yes	No	2
Dispensary	No	Yes	Yes	3.47059	Getting a Dispensing	7367.68	5916.64	1451.04	Yes		42.3272	Stage-ii	No	Yes	No	Yes	No	No	2
Dispensary	No	Yes	Yes	3.48529	Laboratory blood draw	7391.57	5935.76	1455.81	Yes		42.3154	Stage-i	No	Yes	Yes	No	yes	No	2
Dispensary	No	Yes	Yes	3.5	Weighing, BP measurement	7415.46	5954.89	1460.57	No		42.3036	Stage-ii	Yes	No	No	No	No	No	2
Dispensary	No	Yes	No	3.51471	Getting a TCA date	7439.35	5974.01	1465.34	No		42.2918	Stage-ii	No	Yes	No	Yes	Yes	No	2
Dispensary	No	Yes	No	3.52941	Others (TB, STI screening, provision of FP services	7463.24	5993.13	1470.11	No		42.28	Stage-ii	Yes	No	No	Yes	No	No	2
Dispensary	No	Yes	No	3.54412	Drug refill	7487.14	6012.26	1474.88	No		42.2682	Stage-i	No	Yes	Yes	No	yes	No	2
Dispensary	No	Yes	No	3.55882	Clinical consultation	7511.03	6031.38	1479.64	Yes		42.2563	Stage-i	No	Yes	No	Yes	No	No	2
Dispensary	No	Yes	No	3.57353	Individual counselling	7534.92	6050.51	1484.41	No		42.2445	Stage-i	No	Yes	No	Yes	Yes	No	2
Dispensary	No	Yes	No	0	Getting a Dispensing	7558.81	6069.63	1489.18	No		42.2327	Stage-i	No	Yes	No	No	No	No	2
Dispensary	No	Yes	No	3.58824	Getting a TCA date	7582.7	6088.75	1493.95	No		42.2209	stage-ii	No	Yes	Yes	No	yes	No	2
Dispensary	No	Yes	No	3.60294	Others (TB, STI screening, provision of FP services	7606.59	6107.88	1498.72	No		42.2091	stage-i	No	Yes	No	Yes	No	No	2
Dispensary	No	Yes	Yes	3.61765	Drug refill	7630.48	6127	1503.48	Yes		42.1973	Stage-i	Yes	No	No	Yes	Yes	No	2
Dispensary	No	Yes	Yes	3.63235	Drug refill	7654.38	6146.13	1508.25	Yes		42.1854	Stage-ii	Yes	No	No	No	No	No	2
Dispensary	No	Yes	Yes	3.64706	Clinical consultation	7678.27	6165.25	1513.02	Yes		42.1736	Stage-ii	Yes	No	Yes	No	yes	No	2
Dispensary	No	Yes	Yes	3.66176	Weighing, BP measurement	7702.16	6184.37	1517.79	Yes		42.1618	Stage-ii	Yes	No	No	Yes	No	No	2
Dispensary	No	Yes	Yes	3.67647	Getting a TCA date	7726.05	6203.5	1522.55	No		42.15	Stage-i	Yes	No	No	Yes	Yes	No	2
Dispensary	No	Yes	Yes	3.69118	Others (TB, STI screening, provision of FP services	7749.94	6222.62	1527.32	No		42.1382	Stage-ii	Yes	No	No	No	No	No	2
Dispensary	No	Yes	No	3.70588	Drug refill	7773.83	6241.74	1532.09	No		42.1264	Stage-ii	Yes	No	Yes	Yes	yes	No	2
Dispensary	No	Yes	No	3.72059	Clinical consultation	7797.73	6260.87	1536.86	No		42.1145	Stage-ii	No	Yes	No	Yes	No	No	2
Dispensary	No	Yes	No	3.73529	Individual counselling	7821.62	6279.99	1541.62	Yes		42.1027	Stage-i	No	Yes	No	No	Yes	No	2
Dispensary	No	Yes	No	3.75	Clinical consultation	7845.51	6299.12	1546.39	No		42.0909	Stage-i	No	Yes	No	No	No	No	2
Dispensary	No	Yes	No	3.76471	Weighing, BP measurement	7869.4	6318.24	1551.16	No		42.0791	Stage-i	No	Yes	Yes	Yes	yes	No	2
Dispensary	No	Yes	Yes	3.77941	Drug refill	7893.29	6337.36	1555.93	No		42.0673	Stage-i	No	Yes	No	Yes	No	No	2
Dispensary	No	Yes	Yes	3.79412	Clinical consultation	7917.18	6356.49	1560.7	No		42.0555	stage-ii	No	Yes	No	No	Yes	No	2
Dispensary	No	Yes	Yes	3.80882	Individual counselling	7941.07	6375.61	1565.46	Yes		42.0437	stage-i	No	Yes	No	No	No	No	2
Dispensary	No	Yes	Yes	3.82353	Getting a Dispensing	7964.97	6394.74	1570.23	Yes		42.0318	Stage-i	No	Yes	Yes	Yes	yes	No	2
Dispensary	No	Yes	Yes	1	Laboratory blood draw	7988.86	6413.86	1575	Yes		42.02	Stage-ii	No	Yes	No	Yes	No	No	2
Dispensary	No	Yes	Yes	3.83824	Weighing, BP measurement	8012.75	6432.98	1579.77	Yes		42.0082	Stage-ii	Yes	No	No	No	Yes	No	2
Dispensary	No	Yes	No	3.85294	Getting a TCA date	8036.64	6452.11	1584.53	No		41.9964	Stage-ii	Yes	No	No	Yes	No	No	2
Dispensary	No	Yes	No	3.86765	Others (TB, STI screening, provision of FP services	8060.53	6471.23	1589.3	No		41.9846	Stage-i	Yes	No	Yes	Yes	yes	No	2
Dispensary	No	Yes	No	3.88235	Drug refill	8084.42	6490.35	1594.07	No		41.9728	Stage-ii	Yes	No	No	No	No	No	2
Dispensary	No	Yes	No	3.89706	Clinical consultation	8108.32	6509.48	1598.84	No		41.9609	Stage-ii	Yes	No	No	No	Yes	No	2
Dispensary	No	Yes	No	3.91176	Individual counselling	8132.21	6528.6	1603.6	Yes		41.9491	Stage-ii	Yes	No	No	Yes	No	No	2
Dispensary	No	Yes	No	3.92647	Getting a Dispensing	8156.1	6547.73	1608.37	No		41.9373	Stage-i	No	Yes	Yes	Yes	yes	No	2
Dispensary	No	Yes	No	3.94118	Getting a TCA date	8179.99	6566.85	1613.14	No		41.9255	Stage-i	Yes	No	No	No	No	No	2
Dispensary	No	Yes	No	3.95588	Others (TB, STI screening, provision of FP services	8203.88	6585.97	1617.91	No		41.9137	Stage-i	Yes	No	No	No	Yes	No	2
Dispensary	No	Yes	Yes	3.97059	Drug refill	8227.77	6605.1	1622.68	No		41.9019	Stage-i	Yes	No	No	Yes	No	No	2
Dispensary	No	Yes	Yes	3.98529	Drug refill	8251.66	6624.22	1627.44	Yes		41.89	stage-ii	Yes	No	Yes	Yes	yes	No	2
Dispensary	No	Yes	Yes	4	Clinical consultation	8275.56	6643.35	1632.21	Yes		41.8782	stage-i	Yes	No	No	No	No	No	2
Dispensary	No	Yes	Yes	4.01471	Weighing, BP measurement	8299.45	6662.47	1636.98	Yes		41.8664	Stage-i	No	No	No	Yes	Yes	No	2
Dispensary	No	Yes	Yes	4.02941	Getting a TCA date	8323.34	6681.59	1641.75	Yes		41.8546	Stage-ii	No	Yes	No	Yes	No	No	2
Dispensary	No	Yes	Yes	4.04412	Others (TB, STI screening, provision of FP services	8347.23	6700.72	1646.51	No		41.8428	Stage-ii	Yes	No	Yes	No	yes	No	2
Dispensary	No	Yes	No	4.05882	Drug refill	8371.12	6719.84	1651.28	No		41.831	Stage-ii	No	Yes	No	No	No	No	2
Dispensary	No	Yes	No	4.07353	Clinical consultation	8395.01	6738.96	1656.05	No		41.8191	Stage-i	Yes	No	No	Yes	Yes	Yes	2
Dispensary	No	Yes	No	1	Individual counselling	8418.91	6758.09	1660.82	No		41.8073	Stage-ii	Yes	No	No	Yes	No	No	2
Dispensary	No	Yes	No	4.08824	Clinical consultation	8442.8	6777.21	1665.58	Yes		41.7955	Stage-ii	Yes	No	Yes	No	yes	No	2
Dispensary	No	Yes	No	4.10294	Weighing, BP measurement	8466.69	6796.34	1670.35	No		41.7837	Stage-ii	Yes	No	No	No	No	Yes	2
Dispensary	No	Yes	Yes	4.11765	Drug refill	8490.58	6815.46	1675.12	No		41.7719	Stage-i	Yes	No	No	Yes	Yes	No	2
Dispensary	No	Yes	Yes	4.13235	Clinical consultation	8514.47	6834.58	1679.89	No		41.7601	Stage-i	No	Yes	No	Yes	No	No	2
Dispensary	No	Yes	Yes	4.14706	Individual counselling	8538.36	6853.71	1684.66	No		41.7482	Stage-i	No	Yes	Yes	No	yes	Yes	2
Dispensary	No	Yes	Yes	4.16176	Getting a Dispensing	8562.25	6872.83	1689.42	Yes		41.7364	Stage-i	Yes	No	No	Yes	No	No	2
Dispensary	No	Yes	Yes	4.17647	Laboratory blood draw	8586.15	6891.96	1694.19	Yes		41.7246	stage-ii	No	Yes	No	Yes	Yes	No	2
Dispensary	No	Yes	Yes	4.19118	Weighing, BP measurement	8610.04	6911.08	1698.96	Yes		41.7128	stage-i	Yes	No	No	No	No	Yes	2
Dispensary	No	Yes	No	4.20588	Getting a TCA date	8633.93	6930.2	1703.73	Yes		41.701	Stage-i	Yes	No	Yes	No	yes	No	2
Dispensary	No	Yes	No	4.22059	Others (TB, STI screening, provision of FP services	8657.82	6949.33	1708.49	No		41.6892	Stage-ii	Yes	No	No	Yes	No	No	2
Dispensary	No	Yes	No	4.23529	Drug refill	8681.71	6968.45	1713.26	No		41.6773	Stage-ii	Yes	No	No	Yes	Yes	Yes	2
Dispensary	No	Yes	No	4.25	Clinical consultation	8705.6	6987.57	1718.03	No		41.6655	Stage-ii	Yes	No	No	No	No	No	2
Dispensary	No	Yes	No	4.26471	Individual counselling	8729.5	7006.7	1722.8	No		41.6537	Stage-i	No	Yes	Yes	No	yes	No	2
Dispensary	No	Yes	No	4.27941	Getting a Dispensing	8753.39	7025.82	1727.56	Yes		41.6419	Stage-ii	No	Yes	No	Yes	No	Yes	2
Dispensary	No	Yes	No	4.29412	Getting a TCA date	8777.28	7044.95	1732.33	No		41.6301	Stage-ii	Yes	No	No	Yes	Yes	No	2
Dispensary	No	Yes	No	4.30882	Others (TB, STI screening, provision of FP services	8801.17	7064.07	1737.1	No		41.6183	Stage-ii	No	Yes	No	No	No	No	2
Dispensary	No	Yes	Yes	4.32353	Drug refill	8825.06	7083.19	1741.87	No		41.6065	Stage-i	Yes	No	Yes	Yes	yes	Yes	2
Dispensary	No	Yes	Yes	1	Drug refill	8848.95	7102.32	1746.64	No		41.5946	Stage-i	Yes	No	No	Yes	No	No	2
Dispensary	No	Yes	Yes	4.33824	Clinical consultation	8872.84	7121.44	1751.4	Yes		41.5828	Stage-i	Yes	No	No	No	Yes	No	2
Dispensary	No	Yes	Yes	4.35294	Weighing, BP measurement	8896.74	7140.57	1756.17	Yes		41.571	Stage-i	Yes	No	No	No	No	Yes	2
Dispensary	No	Yes	Yes	4.36765	Getting a TCA date	8920.63	7159.69	1760.94	Yes		41.5592	stage-ii	Yes	No	Yes	Yes	yes	No	2
Dispensary	No	Yes	Yes	4.38235	Others (TB, STI screening, provision of FP services	8944.52	7178.81	1765.71	Yes		41.5474	stage-i	No	Yes	No	Yes	No	No	2
Dispensary	No	Yes	No	4.39706	Drug refill	8968.41	7197.94	1770.47	No		41.5356	Stage-i	No	Yes	No	No	Yes	Yes	2
Dispensary	No	Yes	No	4.41176	Clinical consultation	8992.3	7217.06	1775.24	No		41.5237	Stage-ii	Yes	Yes	No	No	No	No	2
Dispensary	No	Yes	No	4.42647	Individual counselling	9016.19	7236.18	1780.01	No		41.5119	Stage-ii	No	Yes	Yes	Yes	yes	No	2
Dispensary	No	Yes	No	4.44118	Clinical consultation	9040.09	7255.31	1784.78	No		41.5001	Stage-ii	Yes	No	No	Yes	No	Yes	2
Dispensary	No	Yes	No	4.45588	Weighing, BP measurement	9063.98	7274.43	1789.54	Yes		41.4883	Stage-i	Yes	No	No	No	Yes	No	2
Dispensary	No	Yes	Yes	4.47059	Drug refill	9087.87	7293.56	1794.31	No		41.4765	Stage-ii	Yes	No	No	Yes	No	No	2
Dispensary	No	Yes	Yes	4.48529	Clinical consultation	9111.76	7312.68	1799.08	No		41.4647	Stage-ii	Yes	No	Yes	Yes	yes	Yes	2
Dispensary	No	Yes	Yes	4.5	Individual counselling	9135.65	7331.8	1803.85	No		41.4528	Stage-ii	Yes	No	No	No	No	No	2
Dispensary	No	Yes	Yes	4.51471	Getting a Dispensing	9159.54	7350.93	1808.62	No		41.441	Stage-i	No	Yes	No	No	Yes	No	2
Dispensary	No	Yes	Yes	4.52941	Laboratory blood draw	9183.43	7370.05	1813.38	Yes		41.4292	Stage-i	No	Yes	No	Yes	No	Yes	2
Dispensary	No	Yes	Yes	4.54412	Weighing, BP measurement	9207.33	7389.18	1818.15	Yes		41.4174	Stage-i	No	Yes	Yes	Yes	yes	No	2
Dispensary	No	Yes	No	4.55882	Getting a TCA date	9231.22	7408.3	1822.92	Yes		41.4056	Stage-i	No	Yes	No	No	No	No	2
Dispensary	No	Yes	No	4.57353	Others (TB, STI screening, provision of FP services	9255.11	7427.42	1827.69	Yes		41.3938	stage-ii	Yes	No	No	No	Yes	Yes	2
Dispensary	No	Yes	No	0	Drug refill	9279	7446.55	1832.45	No		41.3819	stage-i	No	Yes	No	Yes	No	No	2
Dispensary	No	Yes	No	4.58824	Clinical consultation	9302.89	7465.67	1837.22	No		41.3701	Stage-i	Yes	No	Yes	Yes	yes	No	2
Dispensary	No	Yes	No	4.60294	Individual counselling	9326.78	7484.79	1841.99	No		41.3583	Stage-ii	No	Yes	No	No	No	Yes	1
Dispensary	No	Yes	No	4.61765	Getting a Dispensing	9350.68	7503.92	1846.76	No		41.3465	Stage-ii	No	Yes	No	Yes	Yes	No	1
Dispensary	No	Yes	No	4.63235	Getting a TCA date	9374.57	7523.04	1851.52	Yes		41.3347	Stage-ii	No	Yes	No	Yes	No	No	1
Dispensary	No	Yes	No	4.64706	Others (TB, STI screening, provision of FP services	9398.46	7542.17	1856.29	No		41.3229	Stage-i	No	Yes	Yes	No	yes	Yes	1
Dispensary	No	Yes	Yes	4.66176	Drug refill	9422.35	7561.29	1861.06	No		41.311	Stage-ii	No	Yes	No	No	No	No	1
