# Supplementary material for: An Evaluation of Antiretroviral Therapy Adherence in a Community-Based Multi-Month Dispensing Model in Dodoma City Council
Source: Research Square preprint supplement (doi:10.21203/rs.3.rs-4829377/v1), 2024-08-21
Supplement: Supplementary file 2 [file c9f32031d8c0d0636e0ee063.docx]

## Table 1.1 Reliability Statistics for Multi-months Dispensing indicators.

| **Concept** | **Cronbach's Alpha** | **No. of Indicators** | **Interpretation** |
| --- | --- | --- | --- |
| Community multi-months Dispensing | 0.85 | 5 | Good reliability |

**Table 1.2 demographic characteristics of the respondents**

| **Background characteristics** | **Number** | **Percentage** |
| --- | --- | --- |
| **Sex** |  |  |
| Male | 187 | 47.9% |
| Female | 203 | 52.1% |
| **Age in years** |  |  |
| 15-24 | 82 | 21% |
| 25-34 | 122 | 31.3% |
| 35-44 | 124 | 31.8% |
| 45+ | 62 | 15.9% |
| **Marital status** |  |  |
| Single | 96 | 24.6% |
| Married | 269 | 69% |
| Divorced | 12 | 3.1% |
| Widowed | 13 | 3.3% |
| **Educational Status** |  |  |
| Unable to read and write | 123 | 31.5% |
| Able to read and write | 116 | 29.7% |

**Table 1.3. The reason for many Youth living with HIV choose community Multi-month Dispensing**

| Reason provided | Respondents (N=390) | IQR |
| --- | --- | --- |
| Improved supply of drugs and equipment | 102 (26%) | 0.12 [36.4 -54.5] |
| Improved patient handling practice | 90(23%) | 1.17 [27.3- 27.3] |
| Improved number and mix of care providers | 75(19%) | 1.06 [9.1 - 27.3] |
| Reducing waiting time clinic | 33 (8%) | 1.01 [10.3 -12.3] |
| Improve management system | 90 (23%) | 0.05 [11.3 -12.3] |
| Time spent in facility to get services |  |  |
| <2hr | 310(79.4%) | 0.01 [11.2- 12.8] |
| 2-4hr | 80(20.6%) | 0.35 [0.15- 0.08] |
| Accessing prescribed drugs |  |  |
| Yes get all | 169(43.3%) | 1.02 [0.41 -0.52] |
| Somehow I get | 175(44.8%) | 0.27 [0.16- 0.48] |
| Not get all drugs | 46(11.7%) | 0.03 [0.01- 0.09] |
| Convenience to reach HF |  |  |
| Easy to reach HF | 301(77.1%) | 0.23 [0.26-0.38] |
| Not easy to reach HF | 89(22.9%) | 0.42 [0.18-0.85] |

**Table 1.4. Chi-square test for comparing adherence in community-based multi-months dispensing led by ART peer and Community-based multi-months dispensing Led by health workers.**

| Variable | Adhered | Not adhered | X2 | Total |
| --- | --- | --- | --- | --- |
| Number of Community-based ART |  |  |  |  |
| Number of Community-based (led by ART peers) | 101(28%) | 209(52%) | 1.03 | 320 |
| Number of Community-based (Led by HCW) | 45(11%) | 35(9%) | 1.08 | 80 |
|  |  |  |  |  |
| Number of Community-based ART (led by ART peer) | |  |  |  |
| 3 months | 170(42.5%) | 78(19 %) | 1.01 | 248 |
| 6 months | 102(25.5%) | 40(10%) | 1.28 | 142 |
|  |  |  |  |  |
| Number of Community-based ART (led by ART HCW) | |  |  |  |
| 3 months | 85(28%) | 91(30%) | 1.01 | 176 |
| 6 months | 74(25%) | 70(23%) | 1.17 | 124 |
|  | Pearson Chi-square (2) = 12.120 [Pr=0.000] | | | |

**Table 1.5. Influences of adherence to community multi-month dispensing among youth living with HIV.**

| **Variables** | **N (%)** | **AOR at 95% CI** | **P-value** |
| --- | --- | --- | --- |
| Presence of Short Waiting |  |  |  |
| Yes | 310 | 1 |  |
| No | 80 | 0.35 [0.15-0.80] | 0.013* |
| Preference for Multi-month Dispensing: | |  |  |
| Yes | 169 | 1 |  |
| No | 175 | 0.27[0.16-0.48] | 000* |
| Impact on Adherence Due to Dispensing | |  |  |
| Yes | 301 | 1 |  |
| No | 89 | 0.40 [0.18-0.85] | 0.018* |
| Adherence to Clinical Appointment Schedule: | |  |  |
| Yes | 218 | 1 |  |
| No | 172 | 0.392[0.19-0.80] | 0.011* |
| Reduction of Stigma with Longer Refill | |  |  |
| Yes | 354 | 1 |  |
| No | 46 | 0.032[0.01-0.09] | 0.01* |
| Motivation to Take ART Due to Longer Refill | |  |  |
| Yes | 176 | 1 |  |
| No | 124 | 0.62[0.19-1.97] | 0.005 |
| Confidence in Medication Supply System: | |  |  |
| Yes |  | 1 |  |
| No | 21 | 0.96[0.27-3.34] | 0.995 |
| community-based ART supply of drugs | |  |  |
| Yes | 88 | 1 |  |
| No | 14 | 0.17 [36.4 - 54.5] | 0.052 |
| Improve patient handling practice |  |  |  |
| Yes | 42 | 1 |  |
| No | 48 | 0.34 [25.3 - 27.3] | 0.042 |
| Improved number and mix of care providers | |  |  |
| Yes | 40 | 1 |  |
| No | 35 | 0.26 [9.1 - 27.3] | 0.05 |
| Reducing waiting time clinic |  |  |  |
| Yes | 18 | 1 |  |
| No | 15 | 0.53[10.3 - 12.3] | 0.12 |
| Improve management system |  |  |  |
| Yes | 45 | 1 |  |
| No | 45 | 0.21 [11.3 - 12.3] | 0.023 |

**Table 1.6 Logistic regression showing the association between community-based multi-month Dispensing and adherence to anti-retroviral Therapy.**

| **Variables** | **Number (n=390)** | **on Community based refills** | **Not on Community based ART refills** | **95%CI of COR** | **P-value** |
| --- | --- | --- | --- | --- | --- |
| Sex |  |  |  |  |  |
| Male | 187(47.9) | 89 | 98 | 1 |  |
| Female | 203(52.1) | 78 | 125 | 0.68 [0.45-1.02] | 0.068 |
| Age in years |  |  |  |  |  |
| 15-24 | 82(21) | 43 | 39 | 1 |  |
| 25-34 | 122(31.3) | 63 | 59 | 0.39 [0.23-0.72] | 0.001 |
| 35-44 | 124(31.8) | 37 | 87 | 0.38 [0.21-0.68] | 0.001 |
| 45+ | 62(15.9) | 24 | 38 | 0.67[0.35-1.27] | 0.226 |
| Marital status |  |  |  |  |  |
| Single | 96(24.6) | 46 | 50 | 1 |  |
| Married | 269(69) | 110 | 159 | 0.75[0.47-1.20] | 0.233 |
| Divorced | 12(3.1) | 5 | 7 | 0.69[0.21-2.20] | 0.533 |
| Widowed | 13(3.3) | 5 | 8 | 1.10[0.35-343] | 0.862 |
| Educational Status | |  |  |  |  |
| Unable to read and write | 123(31.5) | 50 | 73 | 1 |  |
| Able to read and write | 116(29.7) | 41 | 75 | 1.25[0.74-2.11] | 0.399 |
| Occupational status | |  |  |  |  |
| Gov. employee | 24(6.2) | 13 | 11 | 1 |  |
| Merchant | 21(5.4) | 12 | 9 | 0.52 [0.22- 1.22] | 0.137 |
| Farmer | 278(71.3) | 107 | 171 | 0.68[0.28-1.67] | 0.411 |
| Student | 45(11.5) | 29 | 16 | 0.34[0.17-0.60] | 0.001 |
| Other | 22(5.6) | 8 | 14 | 1.09[0.44-2.69] | 0.844 |
| 6 after initiation Outcome: Viral Suppression (VL<50) | | | |  |  |
| on MMD | 117(30) | 13 | 11 | 1 |  |
| not on MMD | 283(70) | 12 | 9 | 0.67[0.35-1.27] | 0.003 |
| Undetectable (VL>500 copies/Ml) | | | |  |  |
| on MMD | 200(51.2) | 15 | 14 | 1 |  |
| not on MMD | 190(48.8) | 14 | 8 | 0.68[0.75-2.02] | 0.001 |
| 3 months initiation Outcome: Viral Suppression (VL<500) | | | | |  |
| on MMD | 187(47.9) | 13 | 11 | 1 |  |
| not on MMD | 203(52.1) | 12 | 9 | 0.63[0.98-2.44] | 0.05 |
| Outcome: 6 months initiation Undetectable (VL>500 copies/Ml) | | | | |  |
| on MMD | 75(19) | 15 | 14 | 1 |  |
| not on MMD | 315(80.7) | 14 | 8 | 0.39[0.34-6.21] | 0.001* |

## Table 1.7 Average adherence within community based multi-months dispensing

| **Indicators** | **IQR (Number of youth)** |
| --- | --- |
| Average adherence for Regional Referral Hospital | 0.09 [0.03-0.15] |
| Average adherence for District hospital | 1.08 [0.07-0.15] |
| Average adherence for Health centre | 0.14 [0.05-0.19] |
| Average adherence for Dispensary | 0.13 [0.06-0.19] |
|  |  |
| Average adherence for community based MMD | 3.08 [2.13-3.30] |
| Average adherence in Community based led by CHW | 0.04 [0.02-0.06] |
| Average adherence in community based led by ART peer | 0.17 [0.20-0.37] |
|  |  |
| 1 Month ART dispensing | 1.02 [0.23-1.1] |
| 3 Months ART dispensing | 1.22 [0.39-2.10] |
| 6 Months ART dispensing | 1.15 [1.10-2.19] |

*IQR-Interquartile range*
